# Supplementary material
Source: MDPI journal article supplement (https://www.mdpi.com/1424-2818/15/5/655)
Supplement: s1 [file s1]

Archive with 3 entries (3 files):
- Marroquin et al., 2022_Figure S1.pdf
- Marroquin et al., 2022_Tables S1-S2.pdf
- Marroquin et al., 2023_Diversity_Database.xlsx
