# Supplementary material
Source: MDPI journal article supplement (https://www.mdpi.com/1424-2818/15/5/655)
Supplement: s1 [file s1 › Marroquin et al., 2022_Figure S1.pdf]

## The influence of roost type and diet on energy expenditure in bats

Cynthia Marroquin, Thomas Gerth and Agustí Muñoz-García

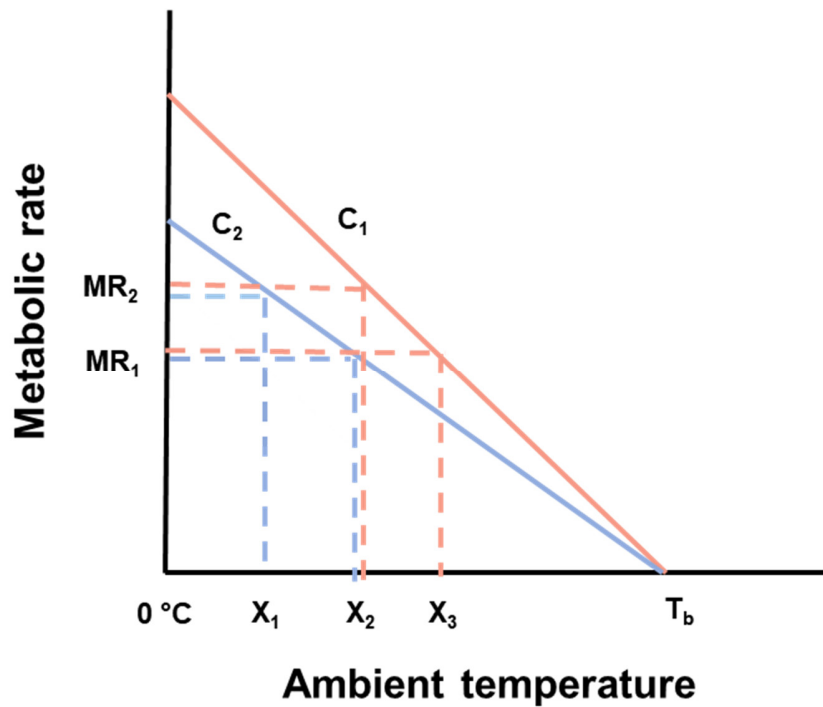

**Supplemental Figure S1.** Hypothetical relationship between metabolic rate and ambient temperature in two individual bats with the same body mass and the same body temperature ( $T_b$ ). In Individual 1 (red), conductance ( $C_1$ ) is higher than in Individual 2 (blue,  $C_2$ ). When we keep roost temperature constant at a value of  $X_2$ , Individual 1, with higher conductance, has a higher metabolic rate ( $MR_2$ ) than Individual 2, with lower conductance ( $MR_1$ ). If Individual 1 needs to lower the MR to a value of  $MR_1$ , then it should move to a site where the temperature in the roost is higher ( $X_3$ ). Individual 2 would reach  $MR_2$  at lower values of temperature ( $X_1$ ) than Individual 1.
