# Supplementary material
Source: MDPI journal article supplement (https://www.mdpi.com/1424-2818/15/5/655)
Supplement: s1 [file s1 › Marroquin et al., 2022_Tables S1-S2.pdf]

## The influence of roost type and diet on energy expenditure in bats

Cynthia Marroquin, Thomas Gerth and Agustí Muñoz-García

**Supplemental Table S1.** Slopes of the relationship between physiological variables and body mass for the 43 species of bats used in this study, using conventional least squares regression.  $C_{\min}$  = minimum conductance;  $C_{\max}$  = maximum conductance; TRP = area of the thermoregulatory polygon;  $T_{bk}$  = breakpoint temperature;  $a_1$  = intercept of the regression line between metabolic rate and ambient temperature below  $T_{bk}$ ;  $b_2$  = slope of the regression line between metabolic rate and ambient temperature above  $T_{bk}$ ; MMSs = “Manmade structures”; RCs = “Rock crevices”; TCHTs = “Tree cavities and hollow trees”; TFB = “Tree foliage and bark”; \*  $p < 0.05$ .

$C_{\min}$  [W/(°C·g)]

|                | Buildings | Caves    | MMSs     | RCs      | TCHTs    | TFB     | All             |
|----------------|-----------|----------|----------|----------|----------|---------|-----------------|
| Frugivorous    |           |          |          |          |          |         | 0.00076*        |
| Omnivorous     |           |          |          |          |          |         | 0.00042*        |
| Insectivorous  | 0.00059   |          |          |          |          |         | 0.00055         |
| Carnivorous    |           |          |          |          |          |         | 0.00054*        |
| Sanguinivorous |           |          |          |          |          |         | 0.00174         |
| All            | 0.00088*  | 0.00036* | 0.00033* | 0.00063* | 0.00057* | 0.00047 | <b>0.00396*</b> |

$C_{\max}$  [W/(°C·g)]

|                | Buildings | Caves   | MMSs   | RCs     | TCHTs   | TFB     | All            |
|----------------|-----------|---------|--------|---------|---------|---------|----------------|
| Frugivorous    |           |         |        |         |         |         | 0.0146*        |
| Omnivorous     |           |         |        |         |         |         | 0.0026         |
| Insectivorous  | 0.0032*   |         |        |         |         |         | 0.0147*        |
| Carnivorous    |           |         |        |         |         |         | -0.0074*       |
| Sanguinivorous |           |         |        |         |         |         | 0.1043*        |
| All            | 0.0132*   | -0.0003 | 0.0128 | 0.0216* | 0.0467* | 0.0131* | <b>0.0116*</b> |

TRP [(W·°C)/g]

|                | Buildings | Caves   | MMSs    | RCs     | TCHTs   | TFB     | All            |
|----------------|-----------|---------|---------|---------|---------|---------|----------------|
| Frugivorous    |           |         |         |         |         |         | 0.1030         |
| Omnivorous     |           |         |         |         |         |         | 1.0281*        |
| Insectivorous  | 0.4462*   |         |         |         |         |         | 0.8766*        |
| Carnivorous    |           |         |         |         |         |         | 0.3503         |
| Sanguinivorous |           |         |         |         |         |         | -1.8320        |
| All            | 0.4142*   | 0.4909* | -0.0045 | 0.8753* | 1.0227* | 1.0204* | <b>0.3619*</b> |

$T_{bk}$  (1/g)

|                | Buildings | Caves    | MMSs   | RCs      | TCHTs  | TFB     | All            |
|----------------|-----------|----------|--------|----------|--------|---------|----------------|
| Frugivorous    |           |          |        |          |        |         | 0.0186         |
| Omnivorous     |           |          |        |          |        |         | 0.0599         |
| Insectivorous  | 0.2807*   |          |        |          |        |         | -0.0012        |
| Carnivorous    |           |          |        |          |        |         | -0.0182        |
| Sanguinivorous |           |          |        |          |        |         | 0.0284         |
| All            | 0.3308*   | -0.0611* | 0.0223 | -0.3987* | 0.0123 | 0.0680* | <b>0.01085</b> |

$a_1$  [W/(°C·g)]

|                | Buildings | Caves    | MMSs    | RCs      | TCHTs    | TFB      | All             |
|----------------|-----------|----------|---------|----------|----------|----------|-----------------|
| Frugivorous    |           |          |         |          |          |          | 0.00102*        |
| Omnivorous     |           |          |         |          |          |          | 0.00069*        |
| Insectivorous  | 0.00014   |          |         |          |          |          | 0.00068*        |
| Carnivorous    |           |          |         |          |          |          | 0.00035*        |
| Sanguinivorous |           |          |         |          |          |          | 0.00064*        |
| All            | 0.00016   | 0.00054* | 0.00018 | 0.00138* | 0.00080* | 0.00062* | <b>0.00076*</b> |

**b<sub>2</sub> [W/(°C·g)]**

|                       | <b>Buildings</b> | <b>Caves</b> | <b>MMSs</b> | <b>RCs</b> | <b>TCHTs</b> | <b>TFB</b> | <b>All</b>     |
|-----------------------|------------------|--------------|-------------|------------|--------------|------------|----------------|
| <b>Frugivorous</b>    |                  |              |             |            |              |            | 0.00305*       |
| <b>Omnivorous</b>     |                  |              |             |            |              |            | 0.00017        |
| <b>Insectivorous</b>  | -0.00071         |              |             |            |              |            | 0.00034        |
| <b>Carnivorous</b>    |                  |              |             |            |              |            | 0.00081*       |
| <b>Sanguinivorous</b> |                  |              |             |            |              |            | 0.00024        |
| <b>All</b>            | -0.00052         | 0.00009      | 0.00236     | 0.00091*   | -0.00015     | 0.00038    | <b>0.00182</b> |

**Supplemental Table S2.** Slopes of the relationship between physiological variables and body mass for the 43 species of bats used in this study, using phylogenetic independent contrasts.  $C_{\min}$  = minimum conductance;  $C_{\max}$  = maximum conductance; TRP = area of the thermoregulatory polygon;  $T_{bk}$  = breakpoint temperature;  $a_1$  = intercept of the regression line between metabolic rate and ambient temperature below  $T_{bk}$ ;  $b_2$  = slope of the regression line between metabolic rate and ambient temperature above  $T_{bk}$ ; MMSs = “Manmade structures”; RCs = “Rock crevices”; TCHTs = “Tree cavities and hollow trees”; TFB = “Tree foliage and bark”.

$C_{\min}$  [W/(°C·g)]

|                      | Caves   | TCHTs    | TFB      | All             |
|----------------------|---------|----------|----------|-----------------|
| <b>Frugivorous</b>   |         |          | 0.00001  | 0.0006*         |
| <b>Omnivorous</b>    |         |          |          | 0.0012*         |
| <b>Insectivorous</b> | 0.0006* | -0.0008* |          | 0.0005*         |
| <b>All</b>           | 0.0006* | 0.00001  | -0.00023 | <b>0.00046*</b> |

$C_{\max}$  [W/(°C·g)]

|                      | Caves   | TCHTs    | TFB      | All            |
|----------------------|---------|----------|----------|----------------|
| <b>Frugivorous</b>   |         |          | 0.0287*  | 0.0133         |
| <b>Omnivorous</b>    |         |          |          | -0.0134*       |
| <b>Insectivorous</b> | 0.0132* | 0.0066   |          | 0.0145*        |
| <b>All</b>           | 0.0013  | -0.0167* | 0.03025* | <b>0.0064*</b> |

TRP (W·°C)

|               | Caves   | TCHTs   | TFB     | All            |
|---------------|---------|---------|---------|----------------|
| Frugivorous   |         |         | 2.0784* | 1.8800*        |
| Omnivorous    |         |         |         | 0.4862*        |
| Insectivorous | 0.1555* | 1.7567* |         | 1.5946*        |
| All           | 0.241*  | 0.921*  | 1.9572* | <b>0.5038*</b> |

T<sub>bk</sub> (1/g)

|               | Caves   | TCHTs    | TFB     | All            |
|---------------|---------|----------|---------|----------------|
| Frugivorous   |         |          | 0.5369* | 0.0692         |
| Omnivorous    |         |          |         | -0.2206*       |
| Insectivorous | 0.00337 | 0.0407*  |         | 0.0306         |
| All           | 0.0110  | -0.1306* | 0.2554* | <b>0.00854</b> |

a<sub>1</sub> [W/(°C·g)]

|               | Caves   | TCHTs    | TFB      | All             |
|---------------|---------|----------|----------|-----------------|
| Frugivorous   |         |          | -0.00010 | 0.00060*        |
| Omnivorous    |         |          |          | 0.00080*        |
| Insectivorous | 0.0006* | 0.0005*  |          | 0.00060*        |
| All           | 0.0008* | 0.00090* | 0.00007  | <b>0.00065*</b> |

**b<sub>2</sub> [W/(°C·g)]**

|                      | <b>Caves</b> | <b>TCHTs</b> | <b>TFB</b> | <b>All</b>     |
|----------------------|--------------|--------------|------------|----------------|
| <b>Frugivorous</b>   |              |              | 0.0026*    | -0.0017*       |
| <b>Omnivorous</b>    |              |              |            | -0.00220*      |
| <b>Insectivorous</b> | 0.0026*      | -0.0016*     |            | 0.0021*        |
| <b>All</b>           | 0.0009       | -0.0028*     | 0.0033*    | <b>0.00048</b> |
