# Supplementary material
Source: MDPI journal article supplement (https://www.mdpi.com/1424-2818/15/5/655)
Supplement: s1 [file s1 › Marroquin et al., 2023_Diversity_Database.xlsx]

## Sheet: MR, Tb and Conductance
Species	Ta (°C)	MR(W)	Tb (°C)	Conductance (W/°C)
Anoura caudifer	9.02299	0.655562	36.4828	0.0238736
Anoura caudifer	8.96552	0.511928	34.069	0.0203927
Anoura caudifer	9.54023	0.637148	35.3908	0.0246473
Anoura caudifer	9.48276	0.563489	34.2414	0.0227593
Anoura caudifer	10.5172	0.515611	34.9885	0.0210701
Anoura caudifer	13.4483	0.592952	34.7586	0.0278246
Anoura caudifer	19.9425	0.449318	36.6552	0.0268849
Anoura caudifer	19.9425	0.419855	36.4253	0.0254723
Anoura caudifer	20.977	0.283586	35.7931	0.0191404
Anoura caudifer	20.977	0.243074	33.092	0.020064
Anoura caudifer	21.954	0.368293	38.2069	0.0226602
Anoura caudifer	21.954	0.298318	35.9655	0.0212909
Anoura caudifer	22.4138	0.294635	35.3908	0.0227044
Anoura caudifer	26.5517	0.220976	34.1839	0.0289532
Anoura caudifer	27.8736	0.33883	39.4138	0.0293608
Anoura caudifer	27.9885	0.235708	35.046	0.0333983
Anoura caudifer	28.1609	0.220976	38.8391	0.0206942
Anoura caudifer	28.4483	0.438269	37	0.0512492
Anoura caudifer	28.4483	0.261488	36.2529	0.0335044
Anoura caudifer	28.5632	0.228342	35.908	0.0310888
Anoura caudifer	28.7931	0.228342	37.5747	0.0260023
Anoura caudifer	28.9655	0.287269	35.6782	0.0427952
Anoura caudifer	29.023	0.265171	36.7126	0.0344842
Anoura caudifer	30	0.261488	35.7931	0.0451379
Anoura caudifer	30	0.25044	36.8851	0.0363744
Anoura caudifer	30.3448	0.327781	36.5977	0.0524209
Anoura caudifer	30.3448	0.309366	35.7356	0.0573878
Anoura caudifer	30.5747	0.261488	39.2988	0.029973
Anoura caudifer	31.954	0.302001	38.7241	0.0446079
Anoura caudifer	31.8966	0.287269	36.9425	0.0569303
Anoura caudifer	31.8966	0.195196	35.4483	0.054958
Anoura caudifer	31.8966	0.18783	34.2988	0.0781875
Anoura caudifer	31.8966	0.136269	40.3908	0.0160424
Anoura caudifer	34.4828	0.265171	39.069	0.0578193
Anoura caudifer	34.4828	0.165732	39.069	0.0361371
Anoura caudifer	35	0.570855	40.908	0.0966233
Anoura caudifer	35	0.548757	40.908	0.092883
Anoura caudifer	35	0.209927	37.2299	0.0941427
Anoura caudifer	37.0115	0.390391	42	0.0782582
Anoura caudifer	37.2414	0.379342	40.1034	0.132541
Artibeus concolor	13.8667	0.716685	37.503	0.0303214
Artibeus concolor	15.4133	0.579262	34.8555	0.029794
Artibeus concolor	18.8836	0.44567	34.6349	0.0282943
Artibeus concolor	18.8836	0.402185	33.9079	0.026769
Artibeus concolor	18.8836	0.370398	33.6244	0.0251274
Artibeus concolor	20.9319	0.528577	38.0011	0.0309666
Artibeus concolor	22.4833	0.371229	35.6281	0.0282414
Artibeus concolor	23.4605	0.351362	35.679	0.0287565
Artibeus concolor	24.8776	0.252423	34.4192	0.0264548
Artibeus concolor	25.436	0.329233	35.4733	0.0328008
Artibeus concolor	25.9588	0.250777	36.7582	0.0232215
Artibeus concolor	28.9849	0.271983	36.4916	0.036232
Artibeus concolor	28.9849	0.251317	36.0917	0.0353625
Artibeus concolor	28.9481	0.22072	32.8859	0.0560526
Artibeus concolor	30.0301	0.219302	36.5018	0.0338863
Artibeus concolor	29.986	0.26739	35.6949	0.0468377
Artibeus concolor	29.9497	0.221291	34.0191	0.0543782
Artibeus concolor	31.0335	0.247123	37.1781	0.0402182
Artibeus concolor	33.0175	0.203688	37.2969	0.047598
Artibeus concolor	33.5245	0.196535	37.5949	0.0482835
Artibeus concolor	34.0388	0.276812	40.103	0.0456469
Artibeus concolor	33.98	0.178869	37.6749	0.0484094
Artibeus concolor	34.0314	0.162575	36.6935	0.0610699
Artibeus concolor	38.0659	0.215974	38.9454	0.245545
Artibeus hirsutus	4	1.38507	39	0.0395735
Artibeus hirsutus	7	1.28769	36	0.044403
Artibeus hirsutus	15	1.02798	33.5	0.0555667
Artibeus hirsutus	25	0.703358	34.5	0.0740377
Artibeus hirsutus	30	0.541044	35	0.108209
Artibeus hirsutus	35	0.846735	36	0.846735
Artibeus hirsutus	38	1.00093	39	1.00093
Artibeus jamaicensis	10.516	0.99201	35.2381	0.0401265
Artibeus jamaicensis	11.0114	1.35224	37.9295	0.0502354
Artibeus jamaicensis	11.0698	1.1294	36.9075	0.0437115
Artibeus jamaicensis	11.0447	1.08822	36.3294	0.0430385
Artibeus jamaicensis	15.5269	1.14428	37.9178	0.0511047
Artibeus jamaicensis	15.5019	0.990483	37.4989	0.0450281
Artibeus jamaicensis	15.5353	0.751805	34.7177	0.0391924
Artibeus jamaicensis	16.019	0.669429	35.0193	0.0352327
Artibeus jamaicensis	19.5107	0.580848	36.3182	0.0345589
Artibeus jamaicensis	19.5107	1.08355	35.6899	0.0669719
Artibeus jamaicensis	19.9806	0.652663	36.5524	0.039384
Artibeus jamaicensis	24.8866	0.402175	35.5483	0.0377213
Artibeus jamaicensis	24.945	0.349369	35.1378	0.0342758
Artibeus jamaicensis	25.4454	0.731474	36.1766	0.0681636
Artibeus jamaicensis	25.4788	0.429428	35.8415	0.0414398
Artibeus jamaicensis	27.9585	0.514463	38.1365	0.0505468
Artibeus jamaicensis	27.9335	0.435255	37.4496	0.0457391
Artibeus jamaicensis	27.9919	0.346542	35.1961	0.0481027
Artibeus jamaicensis	31.0035	0.613109	37.4518	0.0950814
Artibeus jamaicensis	31.0035	0.515948	36.9994	0.0860503
Artibeus jamaicensis	30.9368	0.437791	36.4297	0.0797003
Artibeus jamaicensis	31.4988	0.337445	35.655	0.0811901
Artibeus jamaicensis	33.9137	0.407021	38.0406	0.0986273
Artibeus jamaicensis	34.9563	0.364771	38.4427	0.104629
Artibeus jamaicensis	34.898	0.329913	37.6091	0.121688
Artibeus jamaicensis	35.4852	0.39329	38.7199	0.121583
Artibeus jamaicensis	37.476	0.4535	40.3231	0.159285
Artibeus jamaicensis	35.4852	0.483073	38.7199	0.14934
Artibeus jamaicensis	37.8263	0.450331	40.2979	0.182199
Artibeus jamaicensis	37.476	0.450331	39.7199	0.200687
Artibeus jamaicensis	39.409	0.486479	41.163	0.277363
Artibeus jamaicensis	39.3924	0.471166	40.3169	0.509623
Artibeus jamaicensis	37.9431	0.436309	39.8456	0.229335
Artibeus jamaicensis	39.9345	0.534532	40.5933	0.811366
Artibeus jamaicensis	41.4411	0.573709	43.5589	0.270903
Artibeus jamaicensis	41.4161	0.526184	41.9817	0.930297
Artibeus jamaicensis	42.2419	0.569484	43.2552	0.562039
Artibeus jamaicensis	41.9333	0.518791	43.1965	0.410684
Artibeus literatus	7.02282	2.20779	38.642	0.0698244
Artibeus literatus	7.0105	1.48084	35.8576	0.0513341
Artibeus literatus	10.5236	1.20044	37.0707	0.0452192
Artibeus literatus	11.5834	1.57644	36.9539	0.0621371
Artibeus literatus	11.5638	0.936267	35.5226	0.0390781
Artibeus literatus	12.0643	1.46821	36.2139	0.0607964
Artibeus literatus	13.023	2.2334	41.1156	0.0795014
Artibeus literatus	13.5333	1.44494	35.8288	0.0648086
Artibeus literatus	14.9856	1.78391	39.0709	0.0740659
Artibeus literatus	15.0641	0.945122	37.2308	0.042637
Artibeus literatus	16.0454	1.62535	38.662	0.0718652
Artibeus literatus	16.0061	1.4923	38.3115	0.0669032
Artibeus literatus	18.023	1.45237	37.456	0.0747371
Artibeus literatus	18.0328	1.11878	35.8301	0.0628626
Artibeus literatus	18.5921	0.816049	36.1027	0.0466032
Artibeus literatus	19.0141	0.648291	36.4532	0.0371746
Artibeus literatus	19.7108	1.29811	38.5416	0.0689354
Artibeus literatus	20.0346	0.877016	37.938	0.0489862
Artibeus literatus	20.0346	0.749752	37.2954	0.0434368
Artibeus literatus	24.5092	1.23864	37.5857	0.0947225
Artibeus literatus	24.4797	0.933978	37.3034	0.0728327
Artibeus literatus	25.0391	0.55992	36.4952	0.048875
Artibeus literatus	25.0391	0.463505	34.879	0.0471044
Artibeus literatus	29.9623	0.566844	38.6135	0.0655221
Artibeus literatus	30.5216	0.983346	39.2171	0.113087
Artibeus literatus	30.5216	0.645902	38.224	0.0838572
Artibeus literatus	30.4922	0.466555	37.8443	0.0634585
Artibeus literatus	32.4989	0.696365	36.8123	0.161445
Artibeus literatus	33.0116	0.601869	38.4818	0.110026
Artibeus literatus	32.9625	0.513151	37.6445	0.109602
Artibeus literatus	33.512	0.688628	39.3191	0.118584
Artibeus literatus	33.4826	0.576772	36.7877	0.17451
Artibeus literatus	34.4541	0.669338	39.1926	0.141255
Artibeus literatus	34.9153	0.648126	39.436	0.143369
Artibeus literatus	34.9938	0.569067	38.8907	0.146029
Artibeus literatus	34.9938	0.503493	38.5889	0.140049
Artibeus literatus	35.3078	0.489995	39.4457	0.118416
Artibeus literatus	35.5531	0.932808	39.7865	0.220347
Artibeus literatus	37.0152	0.597901	40.1565	0.19034
Artibeus literatus	37.8297	0.92379	40.1565	0.397029
Artibeus literatus	38.026	0.634553	41.5293	0.18113
Artibeus literatus	38.232	0.634553	40.2149	0.32002
Artibeus literatus	39.5665	0.663481	41.7045	0.310328
Artibeus literatus	40.0081	0.827125	40.8867	0.941436
Artibeus literatus	40.0768	0.72011	44.0996	0.179004
Artibeus literatus	42.5366	1.23715	45.0315	0.49587
Carollia perspicillata	6.033	0.922306	36	0.0307774
Carollia perspicillata	6.5495	0.818251	35.7714	0.0280013
Carollia perspicillata	7.00861	1.07839	36.2857	0.0368339
Carollia perspicillata	6.95122	0.884468	35.7714	0.0306892
Carollia perspicillata	7.00861	0.695277	32.9143	0.0268388
Carollia perspicillata	11.0258	0.704737	36.8571	0.0272822
Carollia perspicillata	10.9684	0.690547	36.6286	0.0269113
Carollia perspicillata	11.0258	0.647979	35.4857	0.0264915
Carollia perspicillata	13.4362	0.770953	36.6857	0.0331599
Carollia perspicillata	13.7231	0.733115	36	0.0329092
Carollia perspicillata	13.5509	0.62433	35.4857	0.028463
Carollia perspicillata	13.5509	0.553384	35.3143	0.0254273
Carollia perspicillata	14.5265	0.671628	38	0.0286122
Carollia perspicillata	19.0603	0.553384	37.2571	0.0304109
Carollia perspicillata	19.0603	0.435139	34.5714	0.0280533
Carollia perspicillata	19.6341	0.515545	37.2	0.0293493
Carollia perspicillata	19.5768	0.477707	36.5143	0.0282041
Carollia perspicillata	20.0933	0.515545	36.5143	0.0313954
Carollia perspicillata	20.6671	0.515545	35.7143	0.034262
Carollia perspicillata	23.4218	0.468248	37.1429	0.0341262
Carollia perspicillata	24.1679	0.539194	37.4286	0.0406611
Carollia perspicillata	24.0531	0.331084	34.9143	0.0304832
Carollia perspicillata	24.9713	0.41622	35.5429	0.0393717
Carollia perspicillata	25.6026	0.468248	36.7429	0.042032
Carollia perspicillata	25.5452	0.335814	36.0571	0.031946
Carollia perspicillata	26.1191	0.468248	38	0.0394118
Carollia perspicillata	26.1191	0.454058	37.3714	0.0403523
Carollia perspicillata	26.0617	0.387842	36.2286	0.0381476
Carollia perspicillata	26.0043	0.331084	34.9143	0.0371588
Carollia perspicillata	27.2095	0.293246	36.9143	0.0302166
Carollia perspicillata	28.0703	0.269597	36.9714	0.030288
Carollia perspicillata	28.0703	0.255408	36.8	0.0292574
Carollia perspicillata	29.1033	0.20338	36	0.0294895
Carollia perspicillata	30.1363	0.345274	38.1714	0.0429705
Carollia perspicillata	30.2511	0.335814	37.8857	0.0439856
Carollia perspicillata	30.0215	0.288516	37.6	0.0380705
Carollia perspicillata	30.1363	0.19865	36	0.033878
Carollia perspicillata	31.5136	0.264868	36.6286	0.0517831
Carollia perspicillata	31.4562	0.250678	35.8286	0.0573329
Carollia perspicillata	32.0875	0.250678	38.8	0.0373451
Carollia perspicillata	32.0875	0.307436	37.4286	0.0575608
Carollia perspicillata	32.0301	0.283787	36.9143	0.0581035
Carollia perspicillata	32.0301	0.236489	36.5143	0.0527388
Carollia perspicillata	32.0301	0.193921	36.1714	0.0468261
Carollia perspicillata	31.9727	0.184461	35.5429	0.0516681
Carollia perspicillata	33.0631	0.132434	36.6857	0.0365578
Carollia perspicillata	34.0961	0.165542	38.3429	0.0389811
Carollia perspicillata	33.9813	0.297976	37.5429	0.0836656
Carollia perspicillata	34.1535	0.250678	36.9143	0.0908001
Carollia perspicillata	34.6126	0.241219	37.5429	0.0823206
Carollia perspicillata	34.5552	0.269597	36.9714	0.11158
Carollia perspicillata	34.7848	0.231759	38	0.0720821
Carollia perspicillata	35.1291	0.316895	39.4286	0.0737059
Carollia perspicillata	35.0717	0.279057	37.9429	0.0971945
Carollia perspicillata	35.0717	0.264868	37.3714	0.115175
Carollia perspicillata	35.0143	0.20811	36.7429	0.120399
Carollia perspicillata	35.5308	0.184461	37.9429	0.0764761
Carollia perspicillata	35.5882	0.137164	37.3714	0.0769203
Carollia perspicillata	36.2195	0.297976	38.6286	0.12369
Carollia perspicillata	36.736	0.260138	39.8857	0.0825912
Carollia perspicillata	36.6212	0.193921	38.4571	0.105627
Carollia perspicillata	37.1377	0.236489	39.4286	0.103233
Carollia perspicillata	37.1377	0.193921	39.2571	0.0914977
Carollia perspicillata	37.1377	0.255408	38.8	0.153651
Carollia perspicillata	37.4821	0.354733	40.6286	0.112739
Carollia perspicillata	37.5968	0.241219	39.8857	0.105388
Carollia perspicillata	37.9986	0.19865	40.0571	0.096499
Carollia perspicillata	38.6298	0.279057	39.3143	0.407714
Carollia perspicillata	38.9742	0.279057	40.5714	0.174711
Carollia perspicillata	38.9742	0.250678	40.1143	0.219872
Carollia perspicillata	39.4907	0.293246	40.8571	0.214602
Carollia perspicillata	39.4907	0.231759	40.2857	0.291506
Chalinolobus gouldii	5	0.508102	34.16	0.0174246
Chalinolobus gouldii	9	0.417776	33.522	0.0170368
Chalinolobus gouldii	14	0.353678	32.6143	0.0190003
Chalinolobus gouldii	19	0.303327	34.15	0.0200216
Chalinolobus gouldii	24	0.244638	33.954	0.0245768
Chalinolobus gouldii	30	0.192945	35.75	0.0335556
Chalinolobus gouldii	36	0.123641	36.4467	0.276808
Chalinolobus gouldii	4	0.0140046	6.75	0.00509259
Chalinolobus gouldii	8.5	0.0135417	12	0.00386905
Chalinolobus gouldii	13.5	0.00844907	15.47	0.00428887
Chalinolobus gouldii	15.5	0.0118056	16.71	0.00975666
Chalinolobus gouldii	23	0.0282407	26.48	0.00811516
Chalinolobus tuberculatus	12.6253	0.211914	30.8261	0.0116431
Chalinolobus tuberculatus	12.7446	0.0978066	17.5217	0.020474
Chalinolobus tuberculatus	14.7733	0.150415	31.7826	0.00884307
Chalinolobus tuberculatus	14.7136	0.0392708	22.6522	0.00494684
Chalinolobus tuberculatus	16.6229	0.149674	22.3043	0.0263444
Chalinolobus tuberculatus	16.8616	0.0266745	19.5217	0.0100274
Chalinolobus tuberculatus	18.3532	0.106698	21.9565	0.0296112
Chalinolobus tuberculatus	18.5322	0.0370479	21.9565	0.0108191
Chalinolobus tuberculatus	19.2482	0.0281564	23.5217	0.00658857
Chalinolobus tuberculatus	19.4272	0.0266745	23.087	0.00728862
Chalinolobus tuberculatus	19.6062	0.157824	29.9565	0.0152483
Chalinolobus tuberculatus	19.7255	0.018524	21.7826	0.00900503
Chalinolobus tuberculatus	20.2029	0.148192	30.4783	0.014422
Chalinolobus tuberculatus	21.0382	0.0148192	22.5652	0.00970455
Chalinolobus tuberculatus	21.5752	0.0970657	33.087	0.00843186
Chalinolobus tuberculatus	21.6348	0.073355	28.8261	0.0102006
Chalinolobus tuberculatus	21.9332	0.036307	23.3478	0.025665
Chalinolobus tuberculatus	22.4105	0.10003	29.1739	0.0147898
Chalinolobus tuberculatus	22.7088	0.154861	31.1739	0.018294
Chalinolobus tuberculatus	22.5298	0.137077	30.0435	0.0182438
Chalinolobus tuberculatus	23.7828	0.0652044	29.1739	0.0120948
Chalinolobus tuberculatus	24.0215	0.111144	31.1739	0.0155393
Chalinolobus tuberculatus	24.2601	0.107439	27.6087	0.0320852
Chalinolobus tuberculatus	27.4224	0.140782	32.913	0.0256406
Chalinolobus tuberculatus	27.7208	0.110403	30.6522	0.0376621
Chrotopterus auritus	6.01218	2.46642	37.8701	0.0774191
Chrotopterus auritus	6.5449	2.50975	38.7532	0.0779222
Chrotopterus auritus	10.3272	2.03857	37.5065	0.0750047
Chrotopterus auritus	10.9665	2.10243	38.3896	0.0766662
Chrotopterus auritus	11.2329	1.94279	37.3506	0.0743856
Chrotopterus auritus	12.4581	1.6007	35.8442	0.0684469
Chrotopterus auritus	13.8965	1.25585	38.6494	0.0507354
Chrotopterus auritus	14.4825	1.75075	36.9351	0.0779757
Chrotopterus auritus	15.0152	2.08403	37.7143	0.0918112
Chrotopterus auritus	14.9619	1.75791	37.5065	0.0779749
Chrotopterus auritus	15.1218	1.5595	35.0649	0.0781971
Chrotopterus auritus	15.6012	1.34969	36.987	0.0631114
Chrotopterus auritus	19.4368	1.98376	37.8182	0.107923
Chrotopterus auritus	20.0228	1.0274	35.2208	0.0676014
Chrotopterus auritus	20.6088	1.42443	37.6623	0.0835268
Chrotopterus auritus	23.965	0.725852	35.6364	0.0621908
Chrotopterus auritus	24.9772	1.36264	38.0779	0.104012
Chrotopterus auritus	24.9772	0.895402	36	0.0812316
Chrotopterus auritus	26.895	1.02923	36.3117	0.109298
Chrotopterus auritus	27.5342	0.801148	35.5844	0.0995194
Chrotopterus auritus	28.067	1.42401	38.2857	0.139353
Chrotopterus auritus	28.4932	0.782916	36.2597	0.100806
Chrotopterus auritus	29.5586	0.90478	37.7662	0.110236
Chrotopterus auritus	31.0502	0.79048	36.7273	0.139241
Chrotopterus auritus	31.0502	0.696957	36.4675	0.128654
Chrotopterus auritus	32.0624	0.801885	37.6104	0.144536
Chrotopterus auritus	32.968	0.836101	37.6623	0.17811
Chrotopterus auritus	33.1811	0.610287	38.0779	0.12463
Chrotopterus auritus	33.2877	0.854352	37.4026	0.207623
Chrotopterus auritus	34.4597	0.918222	38.9091	0.206368
Chrotopterus auritus	34.9924	0.712933	39.2727	0.16656
Chrotopterus auritus	35.0989	1.02084	38.026	0.348761
Desmodus rotundus	5.04912	1.07645	35.6841	0.035138
Desmodus rotundus	5.27593	1.0688	35.1457	0.0357819
Desmodus rotundus	5.07747	1.05502	34.3752	0.0360101
Desmodus rotundus	5.02077	0.864136	33.5897	0.0302474
Desmodus rotundus	5.02325	0.0372746	31.0276	0.0014334
Desmodus rotundus	6.06636	1.00303	35.4081	0.0341845
Desmodus rotundus	9.98863	0.876862	36.134	0.033538
Desmodus rotundus	9.98863	0.846237	35.5382	0.0331214
Desmodus rotundus	9.74295	0.832455	35.4749	0.032351
Desmodus rotundus	9.98863	0.802596	34.7694	0.0323879
Desmodus rotundus	9.98863	0.772737	31.5853	0.0357804
Desmodus rotundus	15.1325	0.675244	35.8724	0.0325577
Desmodus rotundus	15.0096	0.646151	35.3989	0.0316907
Desmodus rotundus	15.0096	0.609401	35.3618	0.0299428
Desmodus rotundus	15.0096	0.591791	34.712	0.0300366
Desmodus rotundus	15.0569	0.531306	34.4056	0.0274594
Desmodus rotundus	15.549	0.631091	35.0146	0.0324208
Desmodus rotundus	19.6408	0.471844	35.1577	0.0304085
Desmodus rotundus	20.1417	0.470313	37.0236	0.027859
Desmodus rotundus	19.9905	0.451169	36.7358	0.026943
Desmodus rotundus	20.3306	0.414018	36.4016	0.0257619
Desmodus rotundus	19.981	0.41288	36.0488	0.0256961
Desmodus rotundus	20.0188	0.366549	35.4918	0.0236896
Desmodus rotundus	20.9478	0.583299	35.2505	0.0407825
Desmodus rotundus	21.0023	0.464208	34.6909	0.033912
Desmodus rotundus	20.8039	0.39377	33.004	0.0322759
Desmodus rotundus	24.514	0.350549	36.3602	0.0295916
Desmodus rotundus	24.514	0.336765	35.2108	0.0314827
Desmodus rotundus	24.514	0.309196	34.8116	0.030026
Desmodus rotundus	24.514	0.269377	34.069	0.0281923
Desmodus rotundus	25.0904	0.329863	36.6032	0.0286517
Desmodus rotundus	25.0431	0.304592	35.4057	0.0293934
Desmodus rotundus	29.0209	0.140034	34.6088	0.02506
Desmodus rotundus	29.4083	0.146926	35.8621	0.0227661
Desmodus rotundus	29.4083	0.112469	33.1651	0.0299379
Desmodus rotundus	29.7391	0.112469	31.7633	0.0555602
Desmodus rotundus	29.9848	0.169893	37.499	0.0226094
Desmodus rotundus	30.4761	0.120122	34.2652	0.0317025
Desmodus rotundus	30.9675	0.179077	33.9387	0.0602714
Desmodus rotundus	31.4022	0.255641	34.7042	0.0774194
Desmodus rotundus	31.5817	0.240328	34.6764	0.0776594
Desmodus rotundus	31.7991	0.249517	35.6988	0.0639829
Desmodus rotundus	31.9975	0.156857	36.4415	0.0352966
Desmodus rotundus	32.0637	0.22348	34.9191	0.0782657
Desmodus rotundus	32.0448	0.260235	36.4522	0.0590446
Desmodus rotundus	32.5172	0.205101	35.9138	0.0603854
Desmodus rotundus	32.5172	0.168343	35.2361	0.0619167
Desmodus rotundus	32.5834	0.14154	36.4615	0.0364974
Desmodus rotundus	32.7629	0.122395	35.8859	0.0391917
Desmodus rotundus	32.8385	0.177532	38.6666	0.0304613
Desmodus rotundus	33.9914	0.189784	36.94	0.0643644
Desmodus rotundus	34.8703	0.146144	37.4877	0.0558352
Desmodus rotundus	35.0498	0.221942	37.4598	0.0920923
Desmodus rotundus	35.0498	0.205098	36.9121	0.110132
Desmodus rotundus	35.0215	0.179066	36.8564	0.0975865
Desmodus rotundus	35.0215	0.123936	39.1386	0.0301028
Desmodus rotundus	35.1538	0.14614	38.8229	0.0398292
Desmodus rotundus	37.0143	0.204587	38.2381	0.167173
Desmodus rotundus	37.0143	0.233683	41.0731	0.0575739
Desmodus rotundus	37.26	0.238275	41.7694	0.0528402
Diaemus youngi	19.9682	0.618676	32.5951	0.0489964
Diaemus youngi	21.9369	0.327484	31.083	0.0358058
Diaemus youngi	25.9247	0.168328	31.7947	0.0286761
Diaemus youngi	25.9255	0.102336	29.398	0.0294705
Diaemus youngi	27.5489	0.233002	34.7448	0.0323802
Diaemus youngi	29.4767	0.264548	33.1282	0.0724479
Diaemus youngi	29.9639	0.181515	32.1997	0.0811829
Diaemus youngi	30.4723	0.204932	33.2337	0.0742107
Diaemus youngi	32.7837	0.285104	35.874	0.0922564
Diaemus youngi	33.1226	0.249975	35.8107	0.0929931
Diaemus youngi	34.9443	0.268072	36.7708	0.146766
Diaemus youngi	34.9443	0.238266	36.5176	0.151444
Diaemus youngi	36.9884	0.349534	37.3301	1.02311
Diphylla ecaudata	8.4669	0.714081	32.5114	0.0296983
Diphylla ecaudata	10.3912	0.754067	31.1334	0.0363542
Diphylla ecaudata	10.9388	0.782547	32.4128	0.0364417
Diphylla ecaudata	19.849	0.47392	31.7794	0.0397239
Diphylla ecaudata	19.9164	0.401734	31.0483	0.0360887
Diphylla ecaudata	19.8912	0.323398	30.2092	0.0313429
Diphylla ecaudata	20.4393	0.510756	33.6983	0.0385214
Diphylla ecaudata	20.414	0.451844	32.718	0.0367234
Diphylla ecaudata	22.5309	0.107406	25.2971	0.0388282
Diphylla ecaudata	24.0629	0.5422	32.7482	0.0624276
Diphylla ecaudata	23.945	0.455453	32.499	0.0532444
Diphylla ecaudata	24.4758	0.204933	33.5847	0.0224982
Diphylla ecaudata	25.0886	0.30704	31.516	0.0477703
Diphylla ecaudata	25.5014	0.2067	32.2472	0.0306414
Diphylla ecaudata	26.0238	0.215763	32.2554	0.0346242
Diphylla ecaudata	30.1999	0.238947	33.7783	0.0667749
Diphylla ecaudata	32.998	0.264899	35.3361	0.113297
Diphylla ecaudata	33.5035	0.330283	37.4961	0.0827235
Diphylla ecaudata	34.0174	0.322514	36.154	0.15095
Diphylla ecaudata	35.5425	0.329636	37.6941	0.153201
Diphylla ecaudata	35.5509	0.262956	37.1707	0.162335
Diphylla ecaudata	37.5543	0.376393	40.0306	0.151996
Epomophorus wahlbergi	11.5	0.9	35.7	0.0371901
Epomophorus wahlbergi	21	0.6	36.3	0.0392157
Epomophorus wahlbergi	30.5	0.5	35.7	0.0961538
Epomophorus wahlbergi	35	0.67	37.6	0.257692
Epomophorus wahlbergi	37.5	0.79	38.7	0.658333
Epomophorus wahlbergi	40	1.32	40.5	2.64
Eptesicus fuscus	9	0.752778	34.01	0.0300991
Eptesicus fuscus	15	0.350629	34.63	0.0178619
Eptesicus fuscus	20	0.248508	34.29	0.0173903
Eptesicus fuscus	25	0.210909	33.91	0.0236711
Eptesicus fuscus	28	0.159506	35.45	0.0214103
Eptesicus fuscus	30	0.0938051	33.93	0.023869
Eptesicus fuscus	35	0.0817754	36.63	0.0501689
Eptesicus fuscus	38	0.119213	38.62	0.192279
Eptesicus fuscus	40	0.211806	40.65	0.325855
Eptesicus fuscus	6	0.0475879	6.2	0.237939
Eptesicus fuscus	18.5	0.0184067	19.0558	0.0331174
Eptesicus fuscus	21	0.0202473	21.9128	0.0221804
Eptesicus fuscus	27	0.0368133	27.9085	0.0405188
Glossophaga soricina	8.60884	0.610042	36.8227	0.0216221
Glossophaga soricina	7.97	0.462033	34.51	0.0174089
Glossophaga soricina	9.12	0.48957	35.03	0.018895
Glossophaga soricina	9.58	0.440612	33.26	0.0186069
Glossophaga soricina	10.0982	0.597902	35.8582	0.0232105
Glossophaga soricina	10.5565	0.713233	35.7447	0.0283161
Glossophaga soricina	10.6137	0.579691	34.8936	0.0238754
Glossophaga soricina	15.0818	0.515956	37.9574	0.0225548
Glossophaga soricina	19.4926	0.336889	37.0496	0.0191883
Glossophaga soricina	20.0655	0.473465	36.1986	0.0293474
Glossophaga soricina	20.18	0.364204	35.7447	0.0233994
Glossophaga soricina	20.581	0.312609	34.6099	0.0222832
Glossophaga soricina	21.0966	0.321714	35.8582	0.021794
Glossophaga soricina	21.5548	0.285293	35.6312	0.0202675
Glossophaga soricina	24.018	0.333854	35.5177	0.0290314
Glossophaga soricina	24.0753	0.394554	35.6312	0.0341431
Glossophaga soricina	24.4763	0.406695	37.5035	0.0312187
Glossophaga soricina	24.5908	0.236733	34.7801	0.0232334
Glossophaga soricina	25.6792	0.242803	33.1348	0.0325668
Glossophaga soricina	26.1375	0.221558	35.0638	0.0248206
Glossophaga soricina	26.9394	0.203347	33.9858	0.0288584
Glossophaga soricina	27.1113	0.185137	33.1915	0.0304492
Glossophaga soricina	27.7414	0.191207	35.8582	0.0235571
Glossophaga soricina	29.5172	0.185137	34.7801	0.0351774
Glossophaga soricina	30.491	0.121401	32.6809	0.0554382
Glossophaga soricina	30.5483	0.154787	34.0993	0.0435895
Glossophaga soricina	30.6629	0.139612	34.9504	0.0325625
Glossophaga soricina	30.7201	0.154787	34.383	0.0422586
Glossophaga soricina	31.4648	0.106226	36.0284	0.0232771
Glossophaga soricina	31.5221	0.188172	34.2128	0.0699351
Glossophaga soricina	32.0376	0.236733	37.5603	0.0428659
Glossophaga soricina	32.5532	0.209417	36.766	0.0497102
Glossophaga soricina	32.5532	0.197277	36.5957	0.0488002
Glossophaga soricina	32.6105	0.118366	35.1206	0.0471562
Glossophaga soricina	33.9853	0.169962	37.7305	0.045381
Glossophaga soricina	33.9853	0.139612	36.0284	0.0683333
Glossophaga soricina	37.0213	0.236733	38.7518	0.136801
Glossophaga soricina	36.964	0.224593	38.2411	0.175856
Glossophaga soricina	37.1931	0.157822	38.4113	0.129552
Glossophaga soricina	39.5417	0.163892	39.6596	1.39082
Histiotus velatus	6.90217	0.260879	17.2617	0.0251825
Histiotus velatus	9.375	0.256381	22.3356	0.0197817
Histiotus velatus	10.3736	0.358334	29.8523	0.0183962
Histiotus velatus	10.8492	0.0269875	14.7248	0.00696336
Histiotus velatus	24.9253	0.136437	29.8523	0.0276912
Histiotus velatus	24.9253	0.068968	27.2215	0.0300356
Histiotus velatus	25.9239	0.053975	29.2886	0.0160417
Histiotus velatus	29.966	0.100453	31.8255	0.0540226
Histiotus velatus	29.966	0.0779639	31.2617	0.0601706
Histiotus velatus	30.9171	0.0824618	31.9195	0.0822689
Histiotus velatus	35.4823	0.125942	36.6174	0.110951
Histiotus velatus	35.4348	0.0944563	35.6779	0.388596
Lasiurus cinereus	0	1.08194	35.3	0.03065
Lasiurus cinereus	5	0.984606	36.44	0.031317
Lasiurus cinereus	10	0.82037	36.28	0.0312165
Lasiurus cinereus	15	0.887616	35.71	0.0428593
Lasiurus cinereus	20	0.598495	35.37	0.0389392
Lasiurus cinereus	25	0.421644	36.1	0.0379859
Lasiurus cinereus	30	0.194444	35.8	0.0335249
Lasiurus cinereus	32.5	0.210648	36	0.0601852
Lasiurus cinereus	35	0.210069	37.3	0.0913345
Lasiurus cinereus	37.5	0.235532	38.77	0.185459
Lasiurus cinereus	40	0.349653	41.07	0.326778
Lasiurus cinereus	10	0.0346065	24	0.00247189
Lasiurus cinereus	0	1.31887	37.05	0.0355969
Lasiurus cinereus	5	1.00278	34.78	0.0336729
Lasiurus cinereus	10	0.916667	33.6	0.0388418
Lasiurus cinereus	15	0.811458	35.05	0.0404717
Lasiurus cinereus	20	0.544213	34.51	0.0375061
Lasiurus cinereus	25	0.327315	33.47	0.038644
Lasiurus cinereus	30	0.298264	36.54	0.0456061
Lasiurus cinereus	32.5	0.271991	39.65	0.0380407
Lasiurus cinereus	35	0.309722	37.41	0.128515
Lasiurus cinereus	37.5	0.306134	38.53	0.297218
Lasiurus cinereus	40	0.317593	41.14	0.27859
Lasiurus cinereus	0	0.390741	13.91	0.0280906
Lasiurus cinereus	5	0.248611	15.75	0.0231266
Lasiurus cinereus	10	0.0680556	14.69	0.0145108
Lasiurus cinereus	15	0.0648148	18.02	0.0214619
Lasiurus cinereus	20	0.125463	23.46	0.036261
Leptonycteris sanborni	5	0.97678	35.71	0.0318066
Leptonycteris sanborni	10	0.822164	36.67	0.0308273
Leptonycteris sanborni	15	0.667548	34.88	0.0335789
Leptonycteris sanborni	20	0.512932	33.17	0.038947
Leptonycteris sanborni	25	0.358316	35.16	0.0352674
Leptonycteris sanborni	30	0.296143	37.0267	0.0421456
Leptonycteris sanborni	33	0.275077	37.2025	0.0654557
Leptonycteris sanborni	35	0.229715	37.05	0.112056
Leptonycteris sanborni	37	0.237241	38.94	0.122289
Macroderma gigas	15	1.47093	36.82	0.0674119
Macroderma gigas	25	0.759381	37.38	0.0613393
Macroderma gigas	30	0.59838	37.62	0.0785275
Macroderma gigas	33	0.466391	37.8	0.0971649
Macroderma gigas	35	0.532407	37.9	0.183589
Macroderma gigas	40	1.07639	41.26	0.854277
Macrotus californicus	5	0.600112	29.5	0.0244944
Macrotus californicus	10	0.48151	30.7	0.0232614
Macrotus californicus	20	0.391551	32.8	0.0305899
Macrotus californicus	30	0.146443	35.3	0.0276308
Macrotus californicus	35	0.0768763	36.2	0.0640636
Miniopterus schreibersii	15	0.643831	35.72	0.0310729
Miniopterus schreibersii	25	0.371207	36.32	0.0327921
Miniopterus schreibersii	30	0.256193	36.63	0.0386415
Miniopterus schreibersii	33	0.153351	36.74	0.0410029
Miniopterus schreibersii	35	0.130227	36.99	0.0654405
Miniopterus schreibersii	37	0.144223	37.5	0.288446
Miniopterus schreibersii	40	0.256802	40.7	0.36686
Molossus molossus	22.5844	0.197876	30.6096	0.0246569
Molossus molossus	23.089	0.423054	32.5557	0.0446884
Molossus molossus	24.5083	0.196236	32.482	0.0246105
Molossus molossus	24.9815	0.284064	33.9464	0.0316862
Molossus molossus	25.0761	0.260976	33.1668	0.0322563
Molossus molossus	25.8238	0.282707	32.3104	0.0435831
Molossus molossus	26.1077	0.248752	32.321	0.0400356
Molossus molossus	26.0446	0.0625126	28.6422	0.0240652
Molossus molossus	29.9641	0.1532	33.9829	0.0381213
Molossus molossus	31.0008	0.178101	35.2842	0.0415791
Molossus molossus	31.0008	0.126028	34.8839	0.0324556
Molossus molossus	34.48	0.103568	35.5581	0.096066
Molossus molossus	35.0373	0.137981	36.5695	0.090053
Molossus molossus	38.0044	0.182244	39.8148	0.100663
Molossus molossus	41.0359	0.209016	42.0366	0.208872
Mops condylurus	15	0.684186	33.71	0.0365679
Mops condylurus	20	0.596106	35.89	0.0375145
Mops condylurus	25	0.356037	33.7	0.0409238
Mops condylurus	30	0.2489	35.43	0.045838
Mops condylurus	35	0.19847	37.68	0.0740558
Mops condylurus	40	0.218921	41.17	0.187112
Mops condylurus	15	0.113411	19.84	0.0234321
Mops condylurus	20	0.204512	26.16	0.0332
Mops condylurus	25	0.127355	29.87	0.026151
Mops condylurus	30	0.167096	34.03	0.0414629
Mops condylurus	35	0.176624	37.41	0.073288
Mops condylurus	40	0.198237	41.2	0.165198
Mystacina tuberculata	9.25781	0.231988	33.1636	0.00970425
Mystacina tuberculata	9.49219	0.0448595	17.9455	0.00530677
Mystacina tuberculata	9.60938	0.0281975	20.0727	0.00269488
Mystacina tuberculata	10.4297	0.0307608	18.5182	0.00380304
Mystacina tuberculata	10.3125	0.0217889	16.4727	0.00353703
Mystacina tuberculata	10.8398	0.280693	30.3	0.014424
Mystacina tuberculata	11.543	0.219171	35.0455	0.00932544
Mystacina tuberculata	11.8359	0.0461413	21.8727	0.00459721
Mystacina tuberculata	12.4219	0.0166622	22.7727	0.00160974
Mystacina tuberculata	14.0625	0.139706	27.6818	0.0102579
Mystacina tuberculata	14.5312	0.0281975	17.6182	0.00913448
Mystacina tuberculata	15.2344	0.0294791	17.7	0.011956
Mystacina tuberculata	17.1094	0.166621	32.5909	0.0107626
Mystacina tuberculata	17.5781	0.212763	29.9727	0.0171657
Mystacina tuberculata	17.5781	0.0628034	27.1091	0.00658941
Mystacina tuberculata	18.0469	0.073057	27.6	0.00764745
Mystacina tuberculata	19.6875	0.146114	31.3636	0.0125139
Mystacina tuberculata	20.0391	0.114071	29.4818	0.0120803
Mystacina tuberculata	20.1562	0.0858741	26.7818	0.012961
Mystacina tuberculata	20.0391	0.0461413	27.3545	0.00630734
Mystacina tuberculata	20.4492	0.0410144	25.1455	0.00873347
Mystacina tuberculata	20.8594	0.189692	34.6364	0.0137688
Mystacina tuberculata	20.8594	0.108945	28.5818	0.0141075
Mystacina tuberculata	20.7422	0.1051	21.8727	0.092964
Mystacina tuberculata	21.2695	0.114071	32.0182	0.0106126
Mystacina tuberculata	21.3281	0.0243524	21.5455	0.112053
Mystacina tuberculata	21.8555	0.0294791	25.3091	0.0085357
Mystacina tuberculata	22.3242	0.0397328	27.6	0.00753117
Mystacina tuberculata	22.3242	0.0679302	27.2727	0.0137274
Mystacina tuberculata	22.6758	0.0756204	27.6818	0.0151058
Mystacina tuberculata	22.9102	0.152523	31.9364	0.0168977
Mystacina tuberculata	24.1406	0.047423	28.1727	0.0117614
Mystacina tuberculata	25.0781	0.185847	33.5727	0.0218782
Mystacina tuberculata	25.7227	0.142269	28.0909	0.0600733
Mystacina tuberculata	26.4844	0.0653668	30.3	0.0171314
Mystacina tuberculata	28.7695	0.06024	28.9909	0.272113
Noctilio albiventris	8.93723	1.28776	30.0282	0.0610574
Noctilio albiventris	9.96434	1.46365	30.0282	0.0729495
Noctilio albiventris	10.4779	1.35058	31.3803	0.0646134
Noctilio albiventris	10.4779	0.979953	30.3099	0.0494128
Noctilio albiventris	11.1056	1.29404	36.338	0.0512847
Noctilio albiventris	11.6191	1.38827	30.3099	0.0742756
Noctilio albiventris	12.8745	1.09931	30.5352	0.0622457
Noctilio albiventris	13.9586	0.998798	29.8028	0.0630388
Noctilio albiventris	18.3524	0.910853	34.5352	0.0562851
Noctilio albiventris	18.98	0.967389	35.493	0.0585837
Noctilio albiventris	19.4936	1.08046	33.9718	0.0746265
Noctilio albiventris	19.4936	0.778937	33.6338	0.0550866
Noctilio albiventris	20.0642	0.7915	29.5211	0.0836953
Noctilio albiventris	20.0642	0.420877	28.338	0.0508685
Noctilio albiventris	20.5207	0.929699	33.2394	0.0730967
Noctilio albiventris	20.9772	0.596766	29.5775	0.0693891
Noctilio albiventris	25.0856	0.546512	32.9014	0.0699238
Noctilio albiventris	25.485	1.08046	35.1549	0.111734
Noctilio albiventris	25.5421	0.75381	34.5915	0.0832988
Noctilio albiventris	25.428	0.515103	33.7465	0.0619225
Noctilio albiventris	25.9986	0.722401	34.9296	0.0808869
Noctilio albiventris	25.9986	0.527667	32.2254	0.0847415
Noctilio albiventris	25.9986	0.282679	29.4084	0.0829
Noctilio albiventris	26.0556	0.150762	28.4507	0.0629469
Noctilio albiventris	30.0499	0.282679	33.8592	0.0742089
Noctilio albiventris	30.5635	0.25127	32.6197	0.122199
Noctilio albiventris	30.5064	0.226143	31	0.45817
Noctilio albiventris	31.077	0.376905	33.9155	0.132785
Noctilio albiventris	31.077	0.238707	31.9437	0.275443
Noctilio albiventris	34.3295	0.301524	36.4507	0.142149
Noctilio albiventris	34.0442	0.282679	36.1127	0.136662
Noctilio albiventris	34.0442	0.270115	35.831	0.151176
Noctilio albiventris	34.4437	0.270115	35.4366	0.272029
Noctilio albiventris	33.9872	0.21358	35.2676	0.166801
Noctilio albiventris	36.3837	0.307806	38.4225	0.150974
Noctilio albiventris	36.4408	0.295242	38.0282	0.185995
Noctilio albiventris	36.4408	0.25127	37.4648	0.245383
Noctilio albiventris	37.0685	0.25127	37.4084	0.739079
Noctilio albiventris	37.1255	0.219861	37.4084	0.777132
Noctilio albiventris	40.0357	0.483695	40.6761	0.755309
Noctilio albiventris	40.1498	0.389469	40.7324	0.66849
Noctilio leporinus	8.08797	1.78628	34.937	0.0665306
Noctilio leporinus	8.66248	1.65262	34.5118	0.0639326
Noctilio leporinus	9.23698	1.89565	34.937	0.0737605
Noctilio leporinus	9.16517	1.82274	34.2992	0.0725207
Noctilio leporinus	9.16517	1.77413	33.5197	0.0728461
Noctilio leporinus	9.59605	1.78628	33.8031	0.0737917
Noctilio leporinus	9.66786	1.66477	32.8819	0.0717139
Noctilio leporinus	10.0987	1.16655	34.2283	0.0483453
Noctilio leporinus	11.2478	1.43389	34.7953	0.0608933
Noctilio leporinus	11.6786	1.37313	34.0866	0.0612786
Noctilio leporinus	12.1813	1.22731	33.0945	0.058686
Noctilio leporinus	12.1813	1.1544	32.1732	0.0577434
Noctilio leporinus	15.6284	0.935673	32.9528	0.054009
Noctilio leporinus	18.6445	0.826308	32.315	0.0604449
Noctilio leporinus	18.6445	0.388851	31.6063	0.0299999
Noctilio leporinus	19.6499	0.777702	33.874	0.0546749
Noctilio leporinus	20.2962	0.984279	35.8583	0.0632487
Noctilio leporinus	21.158	1.04504	33.4488	0.0850257
Noctilio leporinus	22.0916	0.826308	33.4488	0.072756
Noctilio leporinus	22.2352	0.23088	27	0.0484553
Noctilio leporinus	23.0251	0.60758	32.315	0.0654027
Noctilio leporinus	23.0969	0.182274	28.2047	0.0356855
Noctilio leporinus	24.4614	0.522518	33.2362	0.0595475
Noctilio leporinus	25.2513	0.558973	33.8031	0.0653632
Noctilio leporinus	25.0359	0.315942	33.0945	0.0392057
Noctilio leporinus	25.8259	0.571125	34.3701	0.0668434
Noctilio leporinus	26.6876	1.26377	34.7244	0.157247
Noctilio leporinus	28.1957	0.498216	34.5118	0.07888
Noctilio leporinus	28.1239	0.461761	33.874	0.0803043
Noctilio leporinus	30.0628	0.437458	35.2913	0.0836678
Noctilio leporinus	30.0628	0.388851	35.2913	0.0743715
Noctilio leporinus	30.0628	0.364548	34.937	0.0747918
Noctilio leporinus	30.7092	0.364548	34.4409	0.0976872
Noctilio leporinus	31.2118	0.680489	36.2835	0.134176
Noctilio leporinus	31.14	0.388851	35.0787	0.0987257
Noctilio leporinus	31.6427	0.328093	35.2913	0.0899229
Noctilio leporinus	33.079	0.388851	35.9291	0.136432
Noctilio leporinus	33.079	0.352397	35.0079	0.182695
Noctilio leporinus	33.7253	0.413154	35.6457	0.215144
Noctilio leporinus	33.6535	0.340245	34.937	0.26509
Noctilio leporinus	34.0126	0.498216	36.4252	0.206503
Noctilio leporinus	34.0126	0.388851	35.8583	0.21068
Noctilio leporinus	33.8689	0.267335	35.8583	0.134385
Noctilio leporinus	34.5153	0.413154	37.2756	0.149676
Noctilio leporinus	34.5153	0.315942	36.4961	0.159502
Noctilio leporinus	35.1616	0.437458	37.063	0.23007
Noctilio leporinus	35.2334	0.364548	36.9213	0.215981
Noctilio leporinus	35.3052	0.279487	36.2126	0.308011
Noctilio leporinus	35.5206	0.413154	37.5591	0.202685
Noctilio leporinus	36.0233	0.461761	38.4803	0.187939
Noctilio leporinus	36.167	0.328093	38.0551	0.173764
Noctilio leporinus	36.6697	0.388851	38.1969	0.254619
Noctilio leporinus	37.0287	0.413154	39.685	0.155537
Noctilio leporinus	37.6032	0.522518	40.252	0.197271
Noctilio leporinus	37.6032	0.315942	39.189	0.199238
Noctilio leporinus	39.9731	0.595428	41.5276	0.383037
Noctilio leporinus	39.9731	0.571125	41.1732	0.475874
Noctilio leporinus	40.1885	0.461761	40.6	1.12216
Noctilio leporinus	40.6912	0.631883	41.8819	0.530688
Noctilio leporinus	41.553	0.887066	44.7165	0.2804
Noctilio leporinus	42.2711	0.741247	42.874	1.22943
Nycteris thebaica	10	0.3961	37.5	0.0144036
Nycteris thebaica	15	0.2563	36.5	0.0119209
Nycteris thebaica	20	0.157275	37.8	0.00883567
Nycteris thebaica	25	0.1631	37.5	0.013048
Nycteris thebaica	30	0.10485	37.7	0.0136169
Nycteris thebaica	35	0.12815	39.6	0.0278587
Nycteris thebaica	40	0.2563	45	0.05126
Nycteris thebaica	10	0.2097	26.8	0.0124821
Nycteris thebaica	15	0.180575	30.7	0.0115016
Nycteris thebaica	20	0.133975	31.8	0.0113538
Nyctophilus geoffroyi	5	0.389807	31.84	0.0145234
Nyctophilus geoffroyi	10	0.315352	30.56	0.0153381
Nyctophilus geoffroyi	15	0.296929	31.57	0.0179197
Nyctophilus geoffroyi	20	0.227648	32.48	0.018241
Nyctophilus geoffroyi	25	0.160258	31.02	0.0266209
Nyctophilus geoffroyi	30	0.0924238	32.59	0.0356849
Nyctophilus geoffroyi	35	0.062124	35.32	0.194138
Nyctophilus geoffroyi	5.5	0.0236111	9.42	0.00602324
Nyctophilus geoffroyi	10	0.0165509	12.59	0.00639032
Nyctophilus geoffroyi	15	0.00891204	18.35	0.00266031
Nyctophilus geoffroyi	19	0.0142361	21.76	0.00515801
Nyctophilus geoffroyi	24	0.019213	25.95	0.0098528
Nyctophilus timoriensis major	5	0.4798	33	0.0171357
Nyctophilus timoriensis major	10	0.432958	33	0.0188243
Nyctophilus timoriensis major	15	0.359262	33	0.019959
Nyctophilus timoriensis major	20	0.307376	33	0.0236443
Nyctophilus timoriensis major	25	0.215057	33	0.0268821
Nyctophilus timoriensis major	30	0.121828	33	0.0406092
Otonycteris hemprichii	15	0.54115	35.33	0.0266183
Otonycteris hemprichii	20	0.481898	36.2	0.0297468
Otonycteris hemprichii	25	0.33059	35.95	0.0301909
Otonycteris hemprichii	27	0.26142	35.52	0.0306831
Otonycteris hemprichii	29	0.204203	35.42	0.0318073
Otonycteris hemprichii	33.5	0.0867163	35.27	0.0489923
Otonycteris hemprichii	35	0.111129	36.48	0.0750872
Otonycteris hemprichii	36.5	0.123844	37.46	0.129004
Otonycteris hemprichii	37.5	0.125879	38.46	0.131123
Otonycteris hemprichii	15	0.0335676	18.44	0.00975802
Otonycteris hemprichii	20	0.101974	23.51	0.0290525
Otonycteris hemprichii	25	0.160209	30.3	0.0302281
Otonycteris hemprichii	27	0.149528	31.65	0.0321566
Otonycteris hemprichii	29	0.125116	32.33	0.0375723
Otonycteris hemprichii	30	0.125116	32.99	0.0418447
Otonycteris hemprichii	32	0.118758	34.55	0.0465718
Otonycteris hemprichii	33.5	0.102737	34.95	0.0708532
Otonycteris hemprichii	35	0.118758	36.14	0.104174
Otonycteris hemprichii	36.5	0.125879	37.46	0.131123
Otonycteris hemprichii	37.5	0.114435	38.12	0.184573
Phyllostomus discolor	6.02564	1.1852	33.8947	0.0425273
Phyllostomus discolor	6.9943	1.24926	33.2146	0.0476449
Phyllostomus discolor	7.5641	1.32401	35.2551	0.0478136
Phyllostomus discolor	7.5641	1.0891	34.9717	0.0397373
Phyllostomus discolor	8.01994	1.46281	34.6883	0.0548521
Phyllostomus discolor	8.07692	1.19588	34.1215	0.0459166
Phyllostomus discolor	9.10256	1.34536	35.8785	0.050245
Phyllostomus discolor	12.5214	0.790132	31.5708	0.0414779
Phyllostomus discolor	13.547	0.907584	34.0648	0.0442341
Phyllostomus discolor	14.1168	0.902245	35.9919	0.0412453
Phyllostomus discolor	14.1738	0.891568	35.1984	0.042406
Phyllostomus discolor	14.1168	0.875552	34.8583	0.0422126
Phyllostomus discolor	14.4587	0.742084	34.5182	0.0369941
Phyllostomus discolor	15.0855	0.678019	31.1741	0.0421428
Phyllostomus discolor	14.9715	0.459131	29.8138	0.0309341
Phyllostomus discolor	19.5299	0.277614	28.9069	0.029606
Phyllostomus discolor	20.0427	0.555228	35.085	0.0369112
Phyllostomus discolor	20.0997	0.528534	33.9514	0.0381567
Phyllostomus discolor	20.0997	0.491163	33.498	0.0366587
Phyllostomus discolor	20.0997	0.443115	33.2146	0.0337872
Phyllostomus discolor	20.0997	0.416421	33.2146	0.0317518
Phyllostomus discolor	20.1567	0.347018	32.4211	0.0282948
Phyllostomus discolor	20.3276	0.528534	31.9676	0.0454068
Phyllostomus discolor	20.4416	0.347018	31.7976	0.0305582
Phyllostomus discolor	24.4872	0.411083	33.5547	0.0453359
Phyllostomus discolor	24.5442	0.277614	30.7206	0.0449469
Phyllostomus discolor	24.6011	0.224227	30.2105	0.0399735
Phyllostomus discolor	24.5442	0.197533	29.8138	0.0374854
Phyllostomus discolor	25.057	0.389727	34.2915	0.0422033
Phyllostomus discolor	25.057	0.363034	33.1579	0.0448139
Phyllostomus discolor	25.057	0.33634	31.6842	0.0507512
Phyllostomus discolor	25.057	0.245582	31.1741	0.0401467
Phyllostomus discolor	25.057	0.165501	29.1336	0.0405975
Phyllostomus discolor	25.9687	0.266937	35.4818	0.0280599
Phyllostomus discolor	28.8746	0.341679	35.6518	0.0504161
Phyllostomus discolor	29.6154	0.304308	36.332	0.0453068
Phyllostomus discolor	29.6154	0.298969	34.6316	0.0596008
Phyllostomus discolor	29.6154	0.282953	34.1781	0.0620136
Phyllostomus discolor	29.6154	0.266937	33.2146	0.0741658
Phyllostomus discolor	29.6154	0.234904	32.7611	0.0746736
Phyllostomus discolor	29.6154	0.229566	32.1377	0.0910155
Phyllostomus discolor	29.5584	0.176178	35.3117	0.0306219
Phyllostomus discolor	30.2422	0.256259	33.8947	0.0701586
Phyllostomus discolor	29.9003	0.192194	36.2186	0.0304185
Phyllostomus discolor	32.0655	0.304308	36.502	0.0685919
Phyllostomus discolor	32.0655	0.282953	36.2186	0.0681306
Phyllostomus discolor	32.0655	0.256259	35.5385	0.0737875
Phyllostomus discolor	32.0085	0.202872	35.1984	0.0635996
Phyllostomus discolor	32.0085	0.17084	34.8583	0.0599489
Phyllostomus discolor	32.0085	0.154823	36.332	0.0358103
Phyllostomus discolor	32.4074	0.266937	35.085	0.0996921
Phyllostomus discolor	32.4074	0.192194	34.8583	0.0784181
Phyllostomus discolor	33.49	0.224227	36.5587	0.0730696
Phyllostomus discolor	34.4587	0.314985	36.8421	0.132157
Phyllostomus discolor	34.5157	0.256259	36.1053	0.161211
Phyllostomus discolor	34.5157	0.240243	35.9352	0.169239
Phyllostomus discolor	34.5157	0.20821	36.9555	0.0853394
Phyllostomus discolor	35.1994	0.309646	36.5587	0.227803
Phyllostomus discolor	35.1994	0.256259	35.8785	0.377346
Phyllostomus discolor	35.1994	0.250921	36.8988	0.147657
Phyllostomus discolor	35.1994	0.234904	36.2186	0.230481
Phyllostomus discolor	35.3704	0.202872	36.7854	0.143367
Phyllostomus discolor	35.7692	0.218888	38.4858	0.0805744
Phyllostomus discolor	37.0228	0.363034	38.5992	0.230293
Phyllostomus discolor	37.0228	0.29363	37.749	0.404341
Phyllostomus discolor	37.2507	0.29363	37.8623	0.480077
Phyllostomus discolor	37.0228	0.266937	37.9757	0.280127
Phyllostomus discolor	37.1368	0.266937	37.919	0.341231
Phyllostomus discolor	37.3077	0.266937	37.749	0.604893
Phyllostomus discolor	36.8519	0.229566	37.2955	0.517398
Phyllostomus discolor	37.7635	0.229566	37.9757	1.08198
Phyllostomus discolor	38.5613	0.234904	38.9393	0.621413
Phyllostomus discolor	38.8462	0.29363	39.5628	0.409755
Phyllostomus discolor	39.0171	0.245582	39.336	0.769999
Phyllostomus discolor	38.9601	0.288291	40.0729	0.259079
Phyllostomus discolor	39.5299	0.282953	39.7328	1.39469
Phyllostomus discolor	39.302	0.224227	39.5061	1.09875
Phyllostomus hastatus	5.9078	2.16965	36.1122	0.0718322
Phyllostomus hastatus	6.87234	2.4607	36.8972	0.0819553
Phyllostomus hastatus	6.87234	2.39455	33.7009	0.0892536
Phyllostomus hastatus	7.38298	2.42101	36.2804	0.0837794
Phyllostomus hastatus	7.43972	1.90505	32.5794	0.0757787
Phyllostomus hastatus	10.2766	1.78599	33.1963	0.0779239
Phyllostomus hastatus	10.9574	2.24902	36.6729	0.087458
Phyllostomus hastatus	11.0709	2.05058	35.3271	0.0845384
Phyllostomus hastatus	11.0709	2.05058	33.2523	0.0924459
Phyllostomus hastatus	10.9574	1.91828	31.9626	0.0913244
Phyllostomus hastatus	11.0142	1.5214	37.6262	0.0571697
Phyllostomus hastatus	11.9787	2.19611	37.57	0.0858146
Phyllostomus hastatus	11.922	2.18288	36.6729	0.0881937
Phyllostomus hastatus	11.922	2.12996	34.0935	0.0960675
Phyllostomus hastatus	14.8723	1.11128	34.4299	0.0568211
Phyllostomus hastatus	15.0426	0.85992	31.2897	0.0529274
Phyllostomus hastatus	15.4397	1.30973	35.6636	0.0647615
Phyllostomus hastatus	15.4965	1.09805	33.6449	0.060504
Phyllostomus hastatus	15.8936	1.20389	36.2243	0.0592154
Phyllostomus hastatus	15.8369	0.926069	34.9907	0.0483491
Phyllostomus hastatus	16.461	0.820231	34.9907	0.0442659
Phyllostomus hastatus	19.8085	1.40233	34.3738	0.0962788
Phyllostomus hastatus	19.922	0.846691	36.6729	0.050546
Phyllostomus hastatus	20.4326	0.965757	34.1495	0.0704064
Phyllostomus hastatus	20.4326	0.714395	35.6075	0.0470776
Phyllostomus hastatus	20.9433	1.58755	34.5981	0.116262
Phyllostomus hastatus	21	1.53463	36.8411	0.0968762
Phyllostomus hastatus	20.9433	1.27004	36.4486	0.0819096
Phyllostomus hastatus	21.1135	0.88638	34.9907	0.0638732
Phyllostomus hastatus	21.0567	0.820231	34.8224	0.0595852
Phyllostomus hastatus	21	0.60856	34.6542	0.0445694
Phyllostomus hastatus	25.4255	1.94474	34.2617	0.220089
Phyllostomus hastatus	25.4255	0.978986	38.7477	0.0734857
Phyllostomus hastatus	25.4255	0.542411	35.1589	0.0557271
Phyllostomus hastatus	26.9007	0.899609	34.2056	0.123152
Phyllostomus hastatus	26.9007	0.59533	35.6075	0.0683755
Phyllostomus hastatus	26.9007	0.568871	34.6542	0.0733696
Phyllostomus hastatus	26.9007	0.410116	33.9252	0.0583835
Phyllostomus hastatus	27.7518	0.740854	33.757	0.123368
Phyllostomus hastatus	28.8298	0.648248	35.3271	0.0997717
Phyllostomus hastatus	29.9645	0.555641	36.3364	0.0872017
Phyllostomus hastatus	29.9645	0.423345	36.8972	0.0610654
Phyllostomus hastatus	30.5319	0.635018	35.7757	0.121099
Phyllostomus hastatus	30.8156	0.568871	37.4019	0.0863723
Phyllostomus hastatus	30.8156	0.529182	36.8972	0.0870138
Phyllostomus hastatus	30.8156	0.396886	36.2804	0.0726264
Phyllostomus hastatus	31.2128	0.714395	35.4953	0.166815
Phyllostomus hastatus	31.2128	0.60856	35.7196	0.13503
Phyllostomus hastatus	31.5532	0.502722	36.2243	0.107624
Phyllostomus hastatus	32.461	0.383656	36.0561	0.106717
Phyllostomus hastatus	32.9716	0.701166	35.5514	0.271794
Phyllostomus hastatus	32.9716	0.648248	38.1308	0.125649
Phyllostomus hastatus	32.9716	0.529182	37.5701	0.115078
Phyllostomus hastatus	32.9716	0.463034	37.0093	0.114677
Phyllostomus hastatus	33.2553	0.740854	36.785	0.20989
Phyllostomus hastatus	33.3121	0.59533	37.4579	0.143595
Phyllostomus hastatus	33.6525	0.635018	36.8411	0.19915
Phyllostomus hastatus	33.7092	0.635018	37.8505	0.15334
Phyllostomus hastatus	33.7092	0.635018	38.0187	0.147354
Phyllostomus hastatus	33.9929	1.20389	39.7009	0.210912
Phyllostomus hastatus	34.0496	0.85992	39.3645	0.161796
Phyllostomus hastatus	34.4468	0.5821	37.0093	0.227157
Phyllostomus hastatus	34.9574	0.648248	39.1963	0.152931
Phyllostomus hastatus	34.9574	0.568871	38.3551	0.167429
Phyllostomus hastatus	34.9574	0.489494	37.2336	0.215049
Phyllostomus hastatus	35.5816	0.714395	38.9159	0.214255
Phyllostomus hastatus	35.6383	0.60856	38.243	0.23364
Phyllostomus hastatus	36.1489	0.793773	37.6822	0.517687
Phyllostomus hastatus	39.0426	0.807003	42.5047	0.233095
Phyllostomus hastatus	38.9858	0.793773	41.1028	0.374955
Phyllostomus hastatus	39.0426	0.767314	40.9907	0.393878
Phyllostomus hastatus	38.9858	0.59533	40.5981	0.36924
Phyllostomus hastatus	40.5177	0.833461	42.729	0.376921
Phyllostomus hastatus	40.461	0.661477	41.8879	0.463591
Phyllostomus hastatus	41.0284	1.25681	44.0748	0.412556
Phyllostomus hastatus	40.9716	0.952527	42.3364	0.697916
Phyllostomus hastatus	42.5035	0.833461	46.3738	0.215349
Pipistrellus kuhlii	5	0.292454	23	0.0162474
Pipistrellus kuhlii	10	0.318056	22.11	0.0262639
Pipistrellus kuhlii	15	0.247477	24.24	0.0267832
Pipistrellus kuhlii	20	0.220463	27.85	0.0280845
Pipistrellus kuhlii	25	0.165394	30.37	0.0307995
Pipistrellus kuhlii	30	0.0631366	32.35	0.0268666
Pipistrellus kuhlii	5	0.0156998	18.2714	0.00118298
Pipistrellus kuhlii	10	0.00371632	15.3857	0.000690032
Pipistrellus kuhlii	15	0.0134275	19.0714	0.00329799
Pipistrellus kuhlii	20	0.0117477	29.35	0.00125644
Pipistrellus kuhlii	25	0.0175481	27.5857	0.00678656
Pipistrellus kuhlii	30	0.0568973	31.5857	0.0358812
Plattyrhinus lineatus	8.89525	0.807888	36.4068	0.0293654
Plattyrhinus lineatus	9.18167	0.758497	36.4633	0.0278025
Plattyrhinus lineatus	15.8838	0.677356	36.6328	0.0326453
Plattyrhinus lineatus	18.8625	0.504489	36.0113	0.0294183
Plattyrhinus lineatus	18.9198	0.46921	34.8249	0.0295007
Plattyrhinus lineatus	25.3928	0.465682	37.4237	0.0387071
Plattyrhinus lineatus	25.4501	0.412764	37.0282	0.0356502
Plattyrhinus lineatus	31.0638	0.275176	38.4972	0.0370191
Plattyrhinus lineatus	31.0638	0.232841	35.6723	0.0505244
Plattyrhinus lineatus	35.0737	0.267516	39.1186	0.0661351
Plattyrhinus lineatus	37.5941	0.306605	40.4181	0.108572
Rhinonycteris aurantius	15	0.382864	31.2342	0.0235837
Rhinonycteris aurantius	25	0.207577	34.6156	0.0215875
Rhinonycteris aurantius	30	0.1799	35.4144	0.0332262
Rhinonycteris aurantius	32.5	0.101482	36.3033	0.0266825
Rhinonycteris aurantius	35	0.0968693	36.2072	0.0802416
Rhinonycteris aurantius	37.5	0.078418	37.8288	0.238473
Rhinophylla pumilio	8.03653	0.502	32.5589	0.0204711
Rhinophylla pumilio	11.1263	0.429489	33.5022	0.0191943
Rhinophylla pumilio	12.4581	0.0808777	20.0873	0.0106011
Rhinophylla pumilio	12.9909	0.0167333	16.3144	0.00503479
Rhinophylla pumilio	13.5236	0.0251	19.5633	0.00415582
Rhinophylla pumilio	14.1629	0.404389	33.9214	0.0204665
Rhinophylla pumilio	15.6012	0.370922	35.2838	0.0188452
Rhinophylla pumilio	15.5479	0.0390444	19.7729	0.00924131
Rhinophylla pumilio	17.519	0.047411	22.917	0.00878306
Rhinophylla pumilio	19.0107	0.256578	32.8734	0.0185085
Rhinophylla pumilio	20.0228	0.379289	36.0175	0.0237135
Rhinophylla pumilio	20.0228	0.320722	35.2838	0.0210158
Rhinophylla pumilio	20.0228	0.270522	34.8646	0.0182271
Rhinophylla pumilio	20.0228	0.223111	34.8646	0.0150326
Rhinophylla pumilio	20.1294	0.217533	33.9214	0.0157724
Rhinophylla pumilio	25.137	0.329089	36.2271	0.0296741
Rhinophylla pumilio	25.0837	0.278889	35.4935	0.0267912
Rhinophylla pumilio	26.0959	0.237056	36.0175	0.0238929
Rhinophylla pumilio	30.0381	0.186855	36.8559	0.0274068
Rhinophylla pumilio	30.0913	0.072511	31.7205	0.0445071
Rhinophylla pumilio	30.997	0.158967	35.5983	0.0345482
Rhinophylla pumilio	31.0502	0.103189	32.3493	0.0794299
Rhinophylla pumilio	34.3531	0.105978	35.2838	0.113866
Rhinophylla pumilio	35.0989	0.103189	35.2838	0.55806
Rhinophylla pumilio	35.5251	0.128289	36.4367	0.140734
Rhinophylla pumilio	37.4962	0.209167	38.7424	0.167849
Rosettus aegyptiacus	25	1.42985	35.5	0.136176
Rosettus aegyptiacus	28	1.05139	35.5	0.140185
Rosettus aegyptiacus	30	1.00926	35.4	0.1869
Rosettus aegyptiacus	31	0.841088	35.8	0.175227
Rosettus aegyptiacus	32	0.841088	36	0.210272
Rosettus aegyptiacus	33	0.799074	35.4	0.332948
Rosettus aegyptiacus	34	0.756944	36.8	0.270337
Rosettus aegyptiacus	35	0.799074	36.2	0.665895
Rosettus aegyptiacus	36	0.925231	37.8	0.514017
Rosettus aegyptiacus	37	1.05139	37.5	2.10278
Saeromys petrophilus	10	0.13176	25.2	0.00866842
Saeromys petrophilus	15	0.12078	28.8	0.00875217
Saeromys petrophilus	20	0.08784	31.5	0.00763826
Saeromys petrophilus	25	0.06588	30.3	0.0124302
Saeromys petrophilus	30	0.03843	34.5	0.00854
Saeromys petrophilus	35	0.03843	37.8	0.013725
Saeromys petrophilus	40	0.06588	42	0.03294
Saeromys petrophilus	42	0.12627	43.5	0.08418
Sturnira lilium	5.9034	0.812196	35.4633	0.0274763
Sturnira lilium	5.94551	0.413639	29.1773	0.0178049
Sturnira lilium	6.35707	0.692204	35.1471	0.0240432
Sturnira lilium	6.86275	0.279666	25.0115	0.0154097
Sturnira lilium	6.91495	0.777642	33.6912	0.0290422
Sturnira lilium	7.87132	1.02667	37.6612	0.0344638
Sturnira lilium	7.89468	0.935439	36.8755	0.0322778
Sturnira lilium	7.95697	0.885588	34.6107	0.0332256
Sturnira lilium	7.95697	0.835736	34.1794	0.0318711
Sturnira lilium	11.4232	0.691375	36.1307	0.0279825
Sturnira lilium	11.8935	0.525051	33.7041	0.0240732
Sturnira lilium	13.9831	0.489241	34.0327	0.0244015
Sturnira lilium	14.9441	0.686602	37.8559	0.0299673
Sturnira lilium	14.9426	0.438907	34.5668	0.0223656
Sturnira lilium	17.9521	0.71857	37.6341	0.0365089
Sturnira lilium	17.9755	0.560537	36.286	0.0306127
Sturnira lilium	18.9517	0.733378	37.208	0.0401713
Sturnira lilium	18.9906	0.644948	36.8998	0.0360121
Sturnira lilium	18.9906	0.584738	36.1218	0.034133
Sturnira lilium	19.9823	0.474505	34.9031	0.0318016
Sturnira lilium	19.9901	0.39925	37.3219	0.0230357
Sturnira lilium	20.574	0.418065	35.4315	0.0281384
Sturnira lilium	20.9244	0.350335	36.2893	0.0228009
Sturnira lilium	21.2202	0.349394	36.7746	0.0224627
Sturnira lilium	23.9693	0.410474	36.075	0.0339075
Sturnira lilium	24.4909	0.626841	37.5859	0.047869
Sturnira lilium	24.979	0.475032	36.2555	0.0421259
Sturnira lilium	25.0102	0.420467	35.8704	0.0387165
Sturnira lilium	25.2983	0.482557	37.6783	0.0389786
Sturnira lilium	30.4855	0.262987	37.6783	0.0365628
Sturnira lilium	31.0072	0.436412	34.9277	0.111317
Sturnira lilium	31.0072	0.364926	38.0805	0.0515923
Sturnira lilium	31.0072	0.335762	37.4642	0.0519996
Sturnira lilium	31.0072	0.297191	35.5111	0.0659855
Sturnira lilium	31.0072	0.276494	35.2261	0.0655375
Sturnira lilium	30.9916	0.216284	35.868	0.0443534
Sturnira lilium	31.4592	0.321441	36.1838	0.0680352
Sturnira lilium	34.5446	0.405631	36.3125	0.229436
Sturnira lilium	34.5446	0.311566	38.8499	0.0723683
Sturnira lilium	34.6691	0.268291	38.2105	0.0757598
Sturnira lilium	35.0351	0.314388	38.0256	0.105128
Sturnira lilium	35.0039	0.272994	37.5942	0.105391
Sturnira lilium	35.0039	0.233481	37.0165	0.116013
Sturnira lilium	35.2531	0.286162	36.7161	0.195602
Sturnira lilium	35.6463	0.280518	38.5503	0.0965965
Sturnira lilium	37.5767	0.50866	38.2114	0.801471
Sturnira lilium	37.5767	0.4447	38.8634	0.345623
Sturnira lilium	37.4988	0.377916	38.2548	0.499903
Sturnira lilium	37.5689	0.360986	37.8619	1.23191
Sturnira lilium	37.5689	0.325243	39.9957	0.13402
Sturnira lilium	37.5689	0.315838	39.5567	0.158893
Sturnira lilium	37.5689	0.278214	40.3963	0.0983994
Sturnira lilium	38.1218	0.35252	39.2793	0.304543
Sturnira lilium	38.0284	0.302668	38.5629	0.566177
Sturnira lilium	38.5033	0.358164	39.6824	0.30376
Tadarida brasiliensis	15	0.434924	32.91	0.0242838
Tadarida brasiliensis	20	0.272468	32.17	0.0223885
Tadarida brasiliensis	25	0.242403	33.37	0.0289609
Tadarida brasiliensis	30	0.158228	34.7	0.0336656
Tadarida brasiliensis	35	0.116189	36.94	0.0598914
Tadarida brasiliensis	40	0.154725	41.87	0.0827407
Tadarida brasiliensis	8	0.0247799	8.85	0.0291528
Tadarida brasiliensis	15	0.0384645	15.56	0.0686866
Tadarida brasiliensis	19	0.0417875	23.26	0.00980927
Tadarida brasiliensis	24.5	0.0757144	25.54	0.0728023
Tadarida teniotis	15	0.684158	35.42	0.0335043
Tadarida teniotis	20	0.480189	35.02	0.03197
Tadarida teniotis	25	0.393231	35.26	0.0383266
Tadarida teniotis	27	0.319061	35.22	0.0388152
Tadarida teniotis	29	0.294124	34.64	0.0521496
Tadarida teniotis	30	0.29796	35.72	0.052091
Tadarida teniotis	32	0.197255	35.51	0.056198
Tadarida teniotis	33.5	0.238816	36.89	0.0704472
Tadarida teniotis	35	0.224749	37.38	0.0944324
Tadarida teniotis	36.5	0.232742	38.96	0.0946104
Tadarida teniotis	37.5	0.222191	39.91	0.0921956
Tadarida teniotis	40	0.262154	40.59	0.444329
Tadarida teniotis	15	0.1704	22.44	0.0229032
Tadarida teniotis	20	0.136192	25.3	0.0256966
Tadarida teniotis	25	0.325135	32.5	0.0433513
Tadarida teniotis	27	0.26599	33.02	0.0441845
Tadarida teniotis	29	0.231783	34.21	0.044488
Tadarida teniotis	30	0.207805	34.19	0.0495955
Tadarida teniotis	32	0.184147	34.92	0.0630641
Tadarida teniotis	33.5	0.182229	36.7	0.0569466
Tadarida teniotis	35	0.188623	36.33	0.141822
Tadarida teniotis	36.5	0.22379	38.7	0.101723
Tadarida teniotis	37.5	0.237217	39.4	0.124851
Tadarida teniotis	40	0.274942	40.46	0.5977
Taphozous mauritianus	10	0.62808	34.8	0.0253258
Taphozous mauritianus	15	0.54957	38.9	0.0229946
Taphozous mauritianus	20	0.2617	37.1	0.0153041
Taphozous mauritianus	25	0.28787	37.2	0.0235959
Taphozous mauritianus	30	0.20936	38.2	0.0255317
Taphozous mauritianus	35	0.170105	39.2	0.0405012
Taphozous mauritianus	40	0.274785	42.8	0.0981375
Taphozous mauritianus	42	0.274785	42.1	2.74785
Tonatia bidens	5.53997	0.953321	36.8016	0.0304949
Tonatia bidens	9.97128	0.699499	37.5116	0.0253991
Tonatia bidens	10.5185	0.917354	37.0828	0.0345332
Tonatia bidens	10.9562	1.13898	36.57	0.0444676
Tonatia bidens	11.0488	0.775243	37.5116	0.0292956
Tonatia bidens	11.96	0.761231	38.4384	0.0287491
Tonatia bidens	14.9257	0.733866	37.6376	0.032312
Tonatia bidens	15.4645	0.689282	37.0407	0.0319464
Tonatia bidens	15.4436	0.605847	35.3787	0.030391
Tonatia bidens	19.5327	0.445982	32.9271	0.033296
Tonatia bidens	19.9424	0.337691	35.5943	0.0215751
Tonatia bidens	19.875	0.427504	34.9049	0.0284437
Tonatia bidens	20.1444	0.459994	34.9049	0.0311639
Tonatia bidens	20.526	0.280363	32.7253	0.0229819
Tonatia bidens	23.9492	0.460845	37.1883	0.0348095
Tonatia bidens	23.9838	0.519444	35.7758	0.0440504
Tonatia bidens	24.9594	0.227799	37.7347	0.0178312
Tonatia bidens	24.9931	0.37548	35.9104	0.0343932
Tonatia bidens	24.9885	0.335985	33.8095	0.0380891
Tonatia bidens	24.9633	0.281837	32.5401	0.0371973
Tonatia bidens	25.4393	0.288843	37.7852	0.0233959
Tonatia bidens	27.9395	0.309558	36.6418	0.0355721
Tonatia bidens	28.0069	0.450287	35.9776	0.0564923
Tonatia bidens	28.4951	0.536656	36.3475	0.0683428
Tonatia bidens	30.9764	0.331054	36.3605	0.0614878
Tonatia bidens	30.9764	0.243147	36.6548	0.0428203
Tonatia bidens	30.9764	0.331054	37.8233	0.048351
Tonatia bidens	33.0164	0.333664	37.8372	0.069214
Tonatia bidens	33.0164	0.296716	37.0553	0.0734645
Tonatia bidens	33.9902	0.316464	39.5114	0.0573175
Tonatia bidens	34.0407	0.343857	39.1247	0.067635
Tonatia bidens	34.0182	0.273145	37.4084	0.0805683
Tonatia bidens	34.5233	0.283504	37.2655	0.103385
Tonatia bidens	34.5233	0.310897	37.7867	0.0952662
Tonatia bidens	35.9433	0.386703	39.3013	0.115159
Tonatia bidens	36.019	0.339562	38.6035	0.131387
Tonatia bidens	37.9252	0.356125	39.6289	0.20903
